# Supplementary material for: Obesity and Sex Affect the Immune Responses to Tick-Borne Encephalitis Booster Vaccination
Source: PubMed Central journal article supplement (PMC7266951; doi:10.3389/fimmu.2020.00860), 2020-05-27

**Supp. Table 1: General study eligibility****Inclusion Criteria:**

- participants of both sexes between 18 and 60 years of age
- completed primary TBE immunization and at least 1 booster vaccination
- willingness to sign written informed consent form

**Exclusion Criteria:**

- age < 18 and > 60 years
- BMI 25-30
- previous TBE infection
- pregnancy or breast feeding
- acute infection on day of inclusion (day 0), body temperature > 37,9°C
- concomitant medications: systemic cortisone therapy, chemotherapy, immunotherapy (allergy), immunosuppressive therapy 4 weeks prior or during the study
- administration of other vaccines 4 weeks before/after day 0
- planned surgery within 2 weeks before/after TBE booster
- any contraindication to administration of FSME-Immun® vaccine according to manufacturer's instructions
- malignant diseases within 5 years prior to the study
- autoimmune diseases
- kidney insufficiency, dialysis
- drug addiction
- plasma donor
- receipt of blood transfusions or immunoglobulins within 3 months prior to study entry
- severe disease with hospitalization or surgery 3 months before or during the study
- participation in a clinical trial simultaneously to visit 1-4 with receipt of vaccination and/or investigational product within one month before booster

## Obesity, sex and vaccine responsiveness

**Supp. Table 2:** *Changes in metabolic parameters 4 weeks after TBE booster*

Concentrations of triglycerides, total cholesterol, HDL cholesterol, glucose (all mg/dl); insulin (mIU/L), fructosamine ( $\mu\text{mol/L}$ ) and hsCRP (mg/dl) were measured before (d0) and 4 weeks (d28) after booster vaccination. Cholesterol ratio was calculated as total cholesterol/HDL cholesterol and LDL cholesterol was calculated according to the Friedewald formula; values are indicated as geometric mean (GM) concentrations with 95% CI.

Abbreviations: tgl, triglycerides; chol, total cholesterol; LDL, LDL cholesterol; HDL, HDL cholesterol; chol ratio, cholesterol ratio; fruct, fructosamine; L 95% CI, lower 95% confidence interval; U 95% CI, upper 95% confidence interval.

|        |          |          | tgl   | chol  | LDL   | HDL  | chol ratio | glucose | insulin | fruct | hsCRP |
|--------|----------|----------|-------|-------|-------|------|------------|---------|---------|-------|-------|
| female | obese    | d0       | 116,9 | 197,6 | 119,3 | 53,9 | 3,67       | 94,7    | 16,38   | 232,1 | 0,43  |
|        |          | L 95% CI | 94,8  | 181,1 | 102,9 | 47,6 | 3,2        | 87,8    | 12,57   | 221,8 | 0,27  |
|        |          | U 95% CI | 144,2 | 215,5 | 138,3 | 61,0 | 4,21       | 102,1   | 21,35   | 242,9 | 0,66  |
|        | obese    | d28      | 106,6 | 188,5 | 111,0 | 52,9 | 3,56       | 95,5    | 13,84   | 225,7 | 0,31  |
|        |          | L 95% CI | 86,0  | 174,7 | 97,8  | 46,8 | 3,11       | 88,1    | 10,58   | 217,0 | 0,24  |
|        |          | U 95% CI | 132,1 | 203,4 | 126,0 | 59,8 | 4,08       | 103,5   | 18,12   | 234,8 | 0,40  |
|        | controls | d0       | 77,3  | 225,0 | 118,5 | 85,7 | 2,61       | 86,6    | 7,66    | 258,7 | 0,04  |
|        |          | L 95% CI | 62,0  | 205,5 | 101,5 | 75,3 | 2,26       | 80,3    | 5,88    | 246,9 | 0,02  |
|        |          | U 95% CI | 96,3  | 246,4 | 138,4 | 97,6 | 3,02       | 93,4    | 9,98    | 271,0 | 0,06  |
|        | controls | d28      | 72,8  | 218,3 | 114,2 | 84,6 | 2,58       | 85,0    | 6,20    | 243,2 | 0,16  |
|        |          | L 95% CI | 58,2  | 201,6 | 100,0 | 74,4 | 2,24       | 78,5    | 4,74    | 233,6 | 0,13  |
|        |          | U 95% CI | 91,2  | 236,4 | 130,4 | 96,1 | 2,98       | 92,1    | 8,11    | 253,3 | 0,21  |
| male   | obese    | d0       | 152,9 | 196,8 | 137,6 | 40,9 | 4,82       | 97,0    | 22,84   | 229,4 | 0,32  |
|        |          | L 95% CI | 121,8 | 179,2 | 117,2 | 35,7 | 4,15       | 89,3    | 17,15   | 218,4 | 0,20  |
|        |          | U 95% CI | 191,8 | 216,2 | 161,4 | 46,7 | 5,6        | 105,2   | 30,42   | 241,0 | 0,52  |
|        | obese    | d28      | 164,0 | 190,3 | 126,8 | 40,1 | 4,76       | 104,8   | 23,96   | 230,9 | 0,27  |
|        |          | L 95% CI | 130,0 | 175,3 | 110,5 | 35,1 | 4,11       | 96,1    | 17,91   | 221,2 | 0,21  |
|        |          | U 95% CI | 206,8 | 206,6 | 145,4 | 45,8 | 5,5        | 114,4   | 32,06   | 241,0 | 0,35  |
|        | controls | d0       | 88,9  | 204,6 | 117,9 | 62,0 | 3,31       | 89,4    | 6,53    | 247,2 | 0,02  |
|        |          | L 95% CI | 69,8  | 185,2 | 99,4  | 53,8 | 2,82       | 82,1    | 4,85    | 234,9 | 0,01  |
|        |          | U 95% CI | 113,2 | 226,1 | 139,7 | 71,5 | 3,88       | 97,3    | 8,79    | 260,1 | 0,04  |
|        | controls | d28      | 96,1  | 208,6 | 131,9 | 56,2 | 3,72       | 87,2    | 6,70    | 236,2 | 0,15  |
|        |          | L 95% CI | 75,0  | 191,2 | 114,0 | 48,8 | 3,19       | 79,7    | 4,95    | 226,0 | 0,11  |
|        |          | U 95% CI | 123,0 | 227,7 | 152,7 | 64,7 | 4,35       | 95,5    | 9,06    | 246,9 | 0,20  |

## Obesity, sex and vaccine responsiveness

**Supp. Table 3: Serum hormone levels**

Concentrations of the sex hormones testosterone, estrogen and progesterone (in ng/ml) and luteinizing hormone (LH) and follicle-stimulating hormone (FSH) (in mU/ml) indicated as geometric mean (GM) concentrations with 95% CI.

Abbreviations: L 95% CI, lower 95% confidence interval; U 95% CI, upper 95% confidence interval.

|                     | controls male | L 95% CI | U 95% CI | controls female | L 95% CI | U 95% CI |
|---------------------|---------------|----------|----------|-----------------|----------|----------|
| <b>testosterone</b> | 6,05          | 5,16     | 7,10     | 0,13            | 0,09     | 0,19     |
| <b>estrogen</b>     | 28,92         | 24,76    | 33,78    | 19,24           | 9,92     | 37,33    |
| <b>progesterone</b> | 0,18          | 0,12     | 0,28     | 0,31            | 0,14     | 0,73     |
| <b>FSH</b>          | 5,52          | 4,38     | 6,95     | 17,89           | 7,45     | 42,95    |
| <b>LH</b>           | 5,29          | 4,47     | 6,25     | 9,91            | 3,89     | 25,24    |
|                     | obese male    |          |          | obese female    |          |          |
| <b>testosterone</b> | 3,42          | 2,87     | 4,07     | 0,22            | 0,17     | 0,29     |
| <b>estrogen</b>     | 29,61         | 25,98    | 33,75    | 29,92           | 18,11    | 49,41    |
| <b>progesterone</b> | 0,29          | 0,20     | 0,44     | 0,30            | 0,15     | 0,60     |
| <b>FSH</b>          | 4,43          | 3,57     | 5,51     | 16,63           | 9,80     | 28,22    |
| <b>LH</b>           | 5,16          | 4,23     | 6,28     | 12,46           | 7,82     | 19,87    |

## Obesity, sex and vaccine responsiveness

**Supp. Table 4:** *Differences in total B cells, naïve and memory B subsets and plasma blasts according to sex*

PBMCs were stained with fluorochrome-labeled mAbs and analyzed on a BD FACS Canto II flow cytometer. Distributions of total CD19+ B cells and plasma blasts as % of total lymphocytes as well as of naïve, un-switched memory, switched memory and double-negative (DN) B subsets as % of total B cells before (d0) and one week (d7) after TBE booster vaccination are listed. Values for the entire group (all) and separately for females (F) and males (M) before (d0) and 1 week (d7) after booster are indicated.

Abbreviations: ly, lymphocytes; tot, total; unsw, unswitched; sw, switched; DN, double negative; PB, plasma blasts

|                 |            | total B as % of ly |       | naïve as % tot B |       | unsw as % tot B |       | sw as % tot B |       | DN as % tot B |      | PB as % of ly |      |
|-----------------|------------|--------------------|-------|------------------|-------|-----------------|-------|---------------|-------|---------------|------|---------------|------|
|                 |            | d0                 | d7    | d0               | d7    | d0              | d7    | d0            | d7    | d0            | d7   | d0            | d7   |
| <b>obese</b>    | <b>all</b> | 10,58              | 10,56 | 67,13            | 68,01 | 15,16           | 14,18 | 13,86         | 14,11 | 3,84          | 3,71 | 1,69          | 1,89 |
|                 | <b>F</b>   | 10,25              | 10,40 | 69,03            | 69,30 | 13,85           | 13,93 | 13,36         | 13,32 | 3,76          | 3,46 | 1,69          | 1,88 |
|                 | <b>M</b>   | 10,97              | 10,74 | 64,88            | 66,47 | 16,72           | 14,47 | 14,46         | 15,05 | 3,94          | 4,01 | 1,69          | 1,91 |
| <b>controls</b> | <b>all</b> | 8,70               | 7,83  | 60,97            | 59,07 | 18,41           | 19,57 | 15,60         | 16,70 | 5,01          | 4,65 | 1,61          | 2,47 |
|                 | <b>F</b>   | 8,94               | 7,80  | 62,66            | 60,07 | 15,78           | 17,73 | 15,76         | 17,05 | 5,80          | 5,16 | 1,40          | 2,49 |
|                 | <b>M</b>   | 8,37               | 7,87  | 58,68            | 57,73 | 21,98           | 22,07 | 15,40         | 16,24 | 3,94          | 3,97 | 1,90          | 2,45 |

## Obesity, sex and vaccine responsiveness

**Supp. Table 5: Differences in CD4 and CD8 T cell naïve and memory subsets according to sex**

PBMCs were stained with fluorochrome-labeled mAbs and analyzed on a BD FACS Canto II flow cytometer. Distributions of CD3<sup>+</sup>/CD4<sup>+</sup> helper T cells and CD3<sup>+</sup>/CD8<sup>+</sup> cytotoxic T cells as % of total lymphocytes. T naïve, T central memory (T<sub>CM</sub>), T effector memory (T<sub>EM</sub>) and T effector memory RA (T<sub>EMRA</sub>) subsets as % of total CD4 and total CD8 T cells respectively are listed. Values for the entire group (all) and separately for females (F) and males (M) before (d0) and 1 week (d7) after booster are indicated.

Abbreviations: ly, lymphocytes; p sex, p value in respect to sex differences.

ANOVA with linear contrasts; \*p≤0.05, \*\*p≤0.01

|                 |              | CD4 as % of ly |         | CD4 naïve as % CD4 |         | CD4 T <sub>CM</sub> as % CD4 |        | CD4 T <sub>EM</sub> as % CD4 |         | CD4 T <sub>EMRA</sub> as % CD4 |      |
|-----------------|--------------|----------------|---------|--------------------|---------|------------------------------|--------|------------------------------|---------|--------------------------------|------|
|                 |              | d0             | d7      | d0                 | d7      | d0                           | d7     | d0                           | d7      | d0                             | d7   |
| <b>obese</b>    | <b>all</b>   | 45,4           | 43,7    | 51,7               | 51,5    | 34,5                         | 33,7   | 10,6                         | 11,2    | 3,2                            | 3,6  |
|                 | <b>F</b>     | 48,7           | 46,0    | 54,6               | 54,2    | 30,9                         | 30,5   | 10,5                         | 10,9    | 4,0                            | 4,4  |
|                 | <b>M</b>     | 41,3           | 40,8    | 48,0               | 48,1    | 39,0                         | 37,8   | 10,7                         | 11,6    | 2,3                            | 2,6  |
| <hr/>           |              |                |         |                    |         |                              |        |                              |         |                                |      |
| <b>controls</b> | <b>all</b>   | 44,5           | 43,8    | 52,5               | 52,2    | 28,9                         | 29,0   | 15,1                         | 15,2    | 3,4                            | 3,6  |
|                 | <b>F</b>     | 46,4           | 46,1    | 55,1               | 55,1    | 27,0                         | 27,4   | 14,7                         | 14,0    | 3,3                            | 3,5  |
|                 | <b>M</b>     | 41,8           | 40,8    | 49,1               | 48,2    | 31,6                         | 31,3   | 15,7                         | 16,9    | 3,6                            | 3,7  |
|                 | <b>p sex</b> | **p=0.005      | *p=0.01 | *p=0.02            | *p=0.01 | *p=0.03                      | p=0.05 | p=0.12                       | *p=0.04 |                                |      |
| <hr/>           |              |                |         |                    |         |                              |        |                              |         |                                |      |
|                 |              | CD8 as % of ly |         | CD8 naïve as % CD8 |         | CD8 T <sub>CM</sub> as % CD8 |        | CD8 T <sub>EM</sub> as % CD8 |         | CD8 T <sub>EMRA</sub> as % CD8 |      |
|                 |              | d0             | d7      | d0                 | d7      | d0                           | d7     | d0                           | d7      | d0                             | d7   |
| <b>obese</b>    | <b>all</b>   | 17,2           | 17,3    | 38,0               | 37,1    | 14,3                         | 13,3   | 24,3                         | 23,6    | 23,5                           | 26,1 |
|                 | <b>F</b>     | 16,3           | 15,9    | 41,3               | 40,2    | 12,8                         | 12,4   | 21,7                         | 21,6    | 24,3                           | 25,9 |
|                 | <b>M</b>     | 18,3           | 19,0    | 33,8               | 33,3    | 16,1                         | 14,4   | 27,6                         | 26,0    | 22,4                           | 26,3 |
| <hr/>           |              |                |         |                    |         |                              |        |                              |         |                                |      |
| <b>controls</b> | <b>all</b>   | 19,4           | 19,8    | 39,5               | 38,3    | 10,2                         | 10,5   | 27,7                         | 27,9    | 22,6                           | 23,3 |
|                 | <b>F</b>     | 19,0           | 19,7    | 41,5               | 40,2    | 9,2                          | 10,4   | 27,1                         | 26,0    | 22,2                           | 23,4 |
|                 | <b>M</b>     | 19,9           | 19,9    | 36,7               | 35,7    | 11,5                         | 10,7   | 28,5                         | 30,5    | 23,3                           | 23,1 |
|                 | <b>p sex</b> | p=0.59         | p=0.45  | p=0.14             | p=0.17  | p=0.18                       | p=0.64 | p=0.17                       | p=0.10  |                                |      |

## Obesity, sex and vaccine responsiveness

### Supp. Fig. 1: Study design

Flow-diagram of study design and study participants from screening to evaluation.

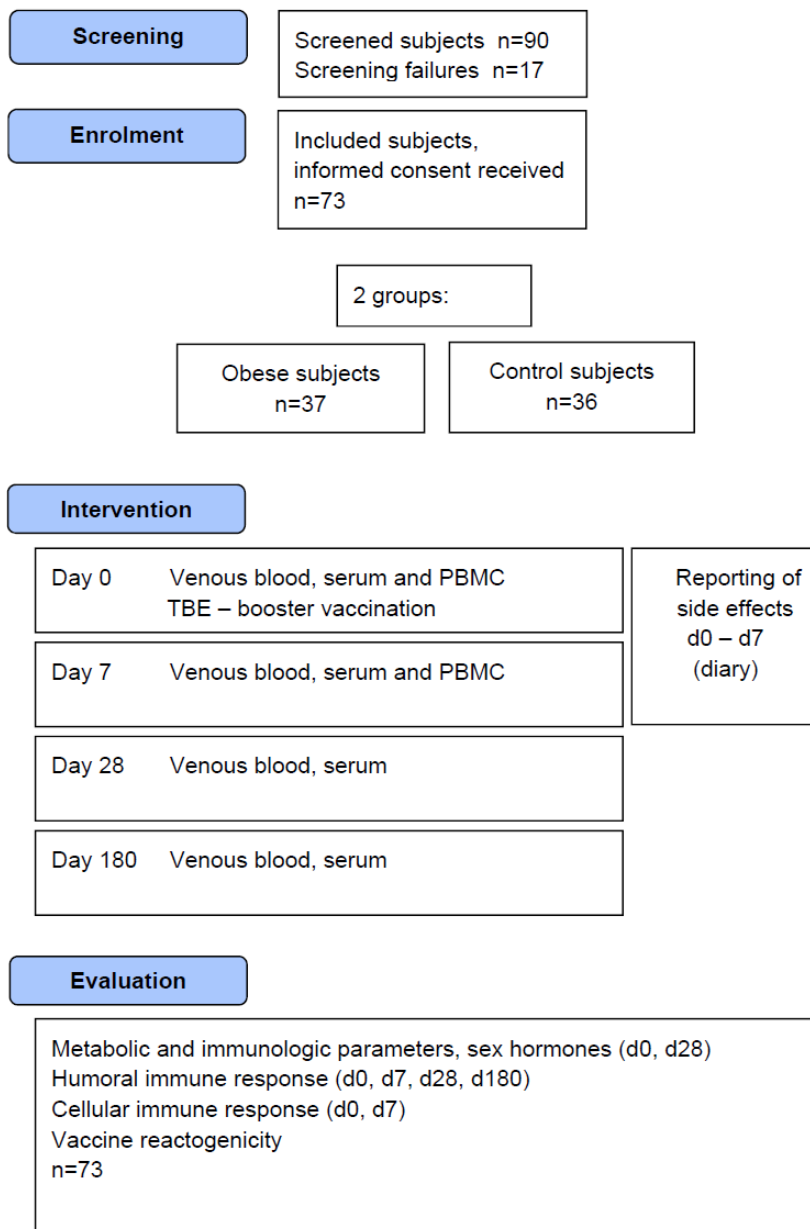

## Obesity, sex and vaccine responsiveness

### Supp. Fig. 2: Quantification of T lymphocytes and T cell subsets

PBMC were stained with fluorochrome-labeled mAbs and analyzed on a BD FACS Canto II flow cytometer. (A) CD3+ total T-cells (B) CD3+/CD4+ T-helper cells and (C) CD3+/CD8+ cytotoxic T-cells, and D) calculated CD3+/CD4-/CD8- NK T cells before (d0) and 1 week (d7) after booster vaccination as % of lymphocytes in the two investigated groups; line is arithmetic mean.

ANOVA with linear contrasts; \*  $p \leq 0.05$

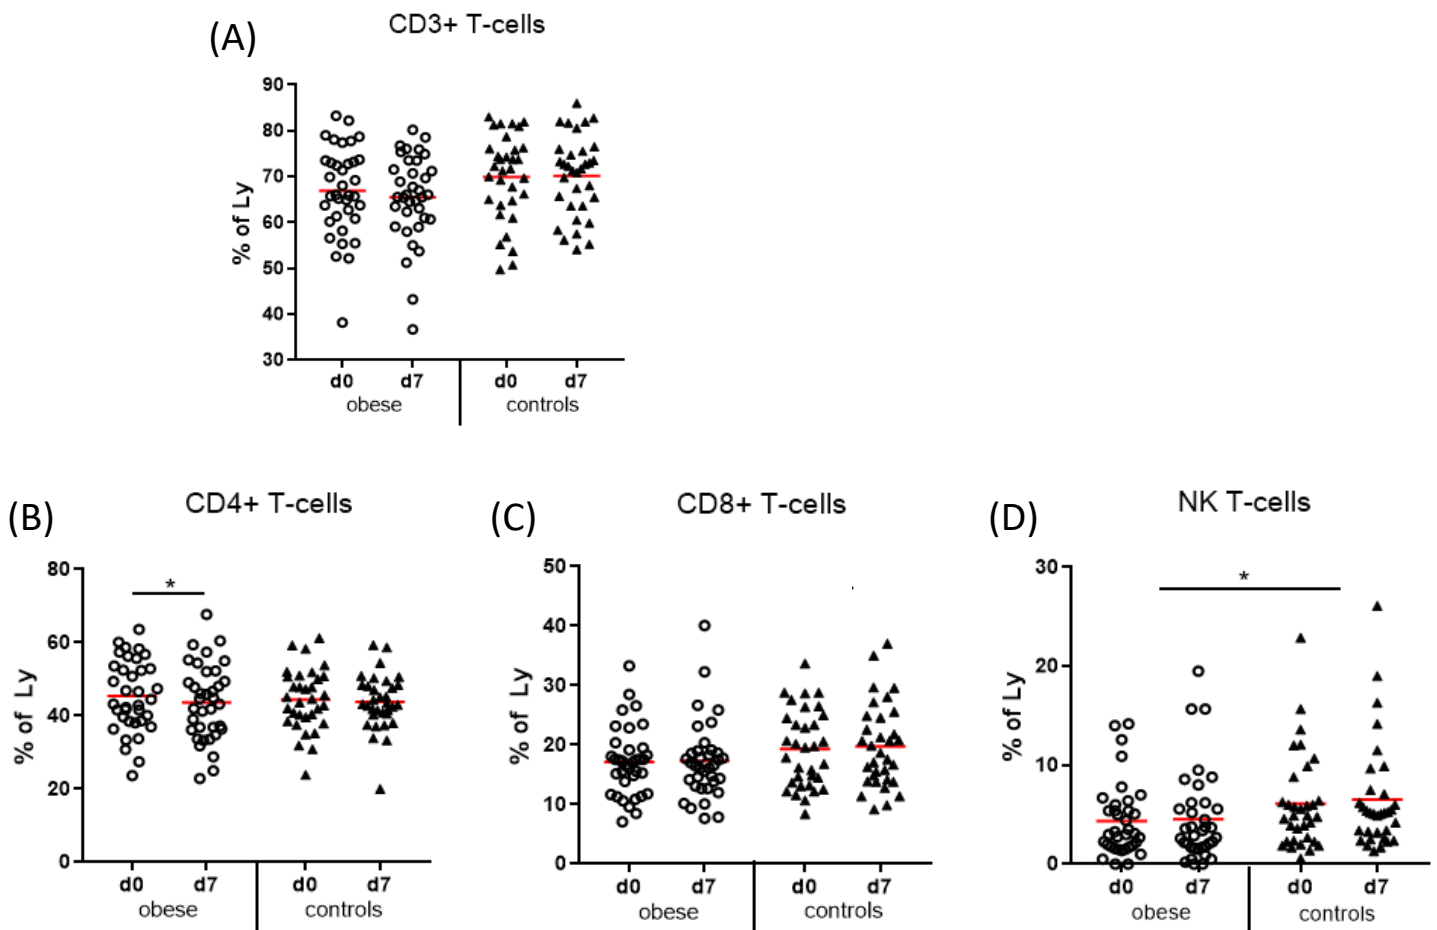

## Obesity, sex and vaccine responsiveness

### Supp. Fig. 3: Total IgA & SEB-specific IL-17 production

A) Concentrations of total serum immunoglobulin A (IgA) in obese and control cohort measured before (d0) and 4 weeks after vaccination (d28); in mg/dl as geometric mean (GM) with 95% CI.

ANOVA with linear contrasts; \*\* $p \leq 0.01$

B) IL-17 concentrations (pg/ml) were measured in PBMC culture supernatants with Luminex technology. PBMC obtained before (d0) and 1 week (d7) after booster were incubated with 1  $\mu\text{g/ml}$  *Staphylococcus* Enterotoxin B for 48 h. Geometric mean (GM) concentrations (pg/ml) with 95% CI.

ANOVA with linear contrasts;

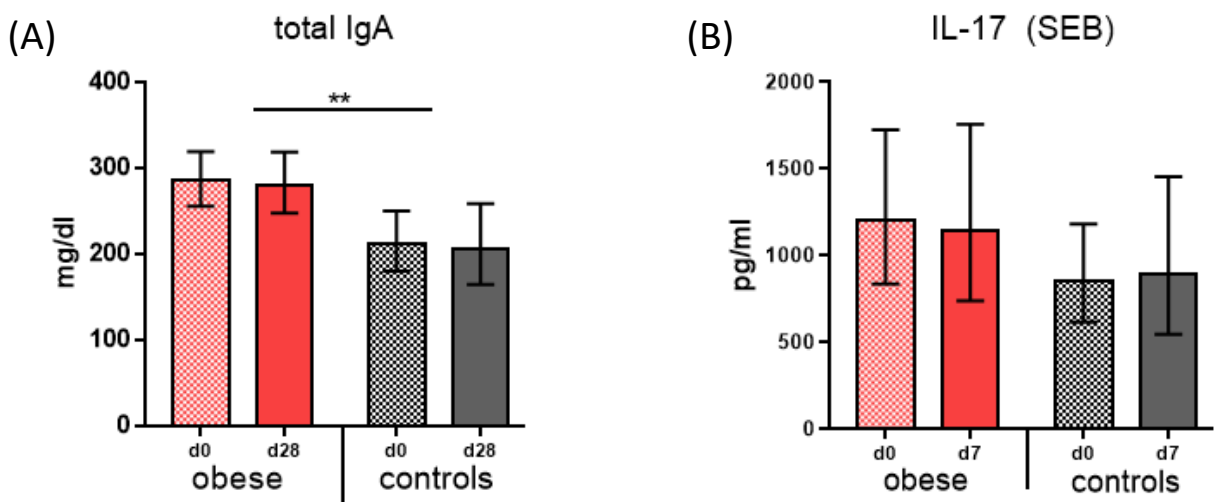



## Obesity, sex and vaccine responsiveness

### Supp. Fig. 4: Incidence of single local and systemic side effects

Incidence of (A) single local and (B) single systemic side effects according to sex

(A)

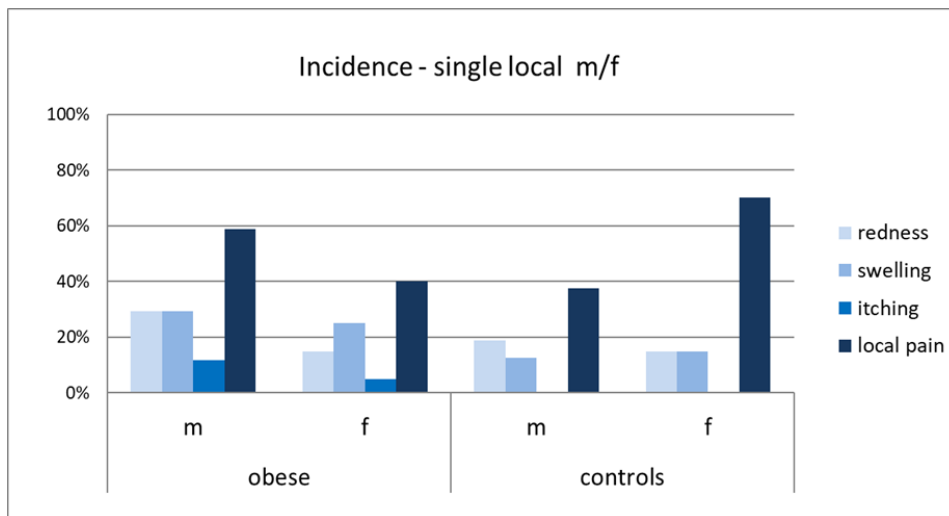

(B)

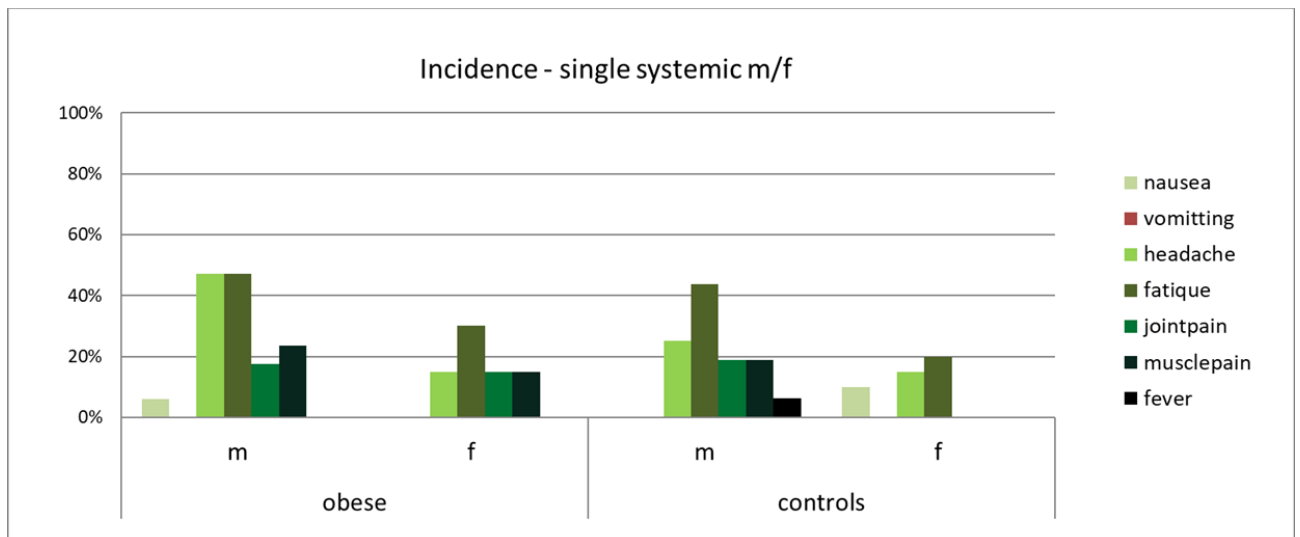

## Obesity, sex and vaccine responsiveness

### Supp. Fig. 5: Intensity and duration of local and systemic side effects

(A) Intensity and duration of local side effects according to sex

Arithmetic means of intensities of local side effects after vaccination for males and females over a 7-day period; error bar is SEM. Local effects are pain, redness, itching and swelling at the injection site. Intensity classified as one/mild, two/intermediate, three/strong.

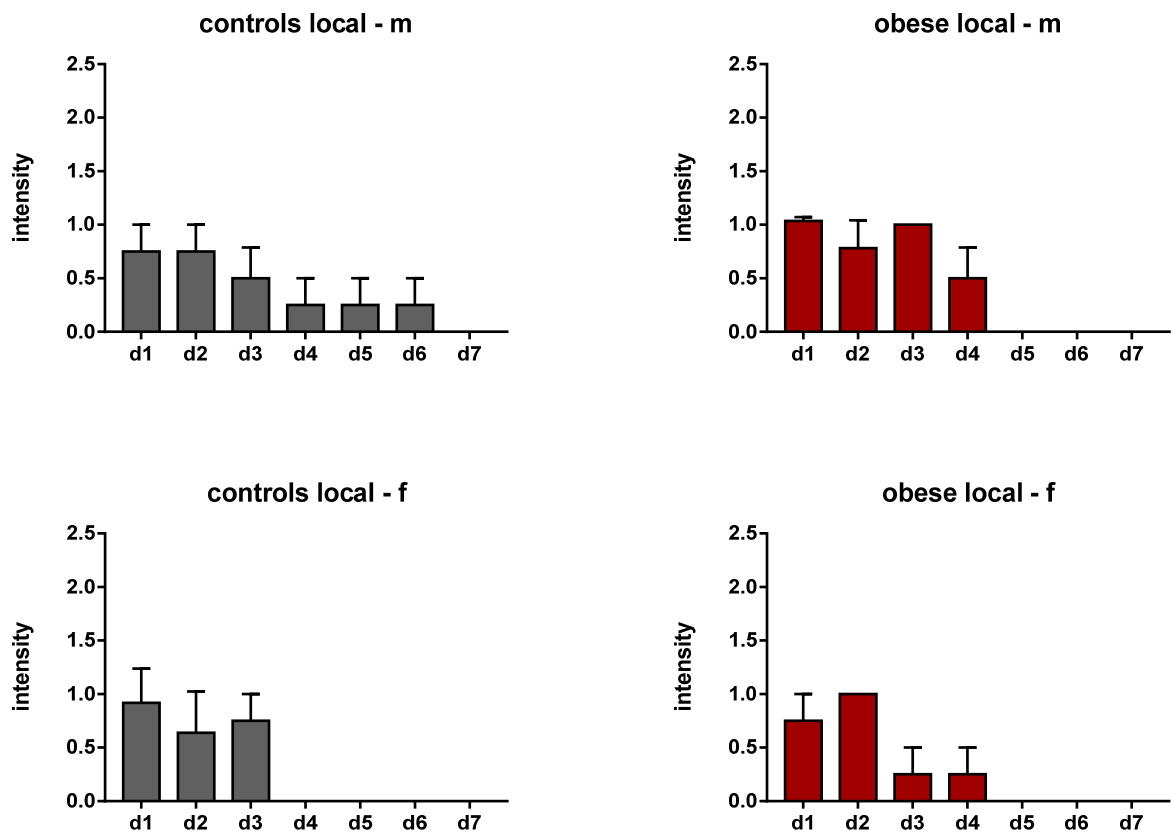

## Obesity, sex and vaccine responsiveness

### (B) Intensity and duration of systemic side effects according to sex

Arithmetic means of intensities of systemic side effects after vaccination for males and females over a 7-day period; error bar is SEM. Systemic effects are nausea, vomiting, headache, fatigue, joint pain, muscle pain and fever. Intensity classified as one/mild, two/intermediate, three/strong.

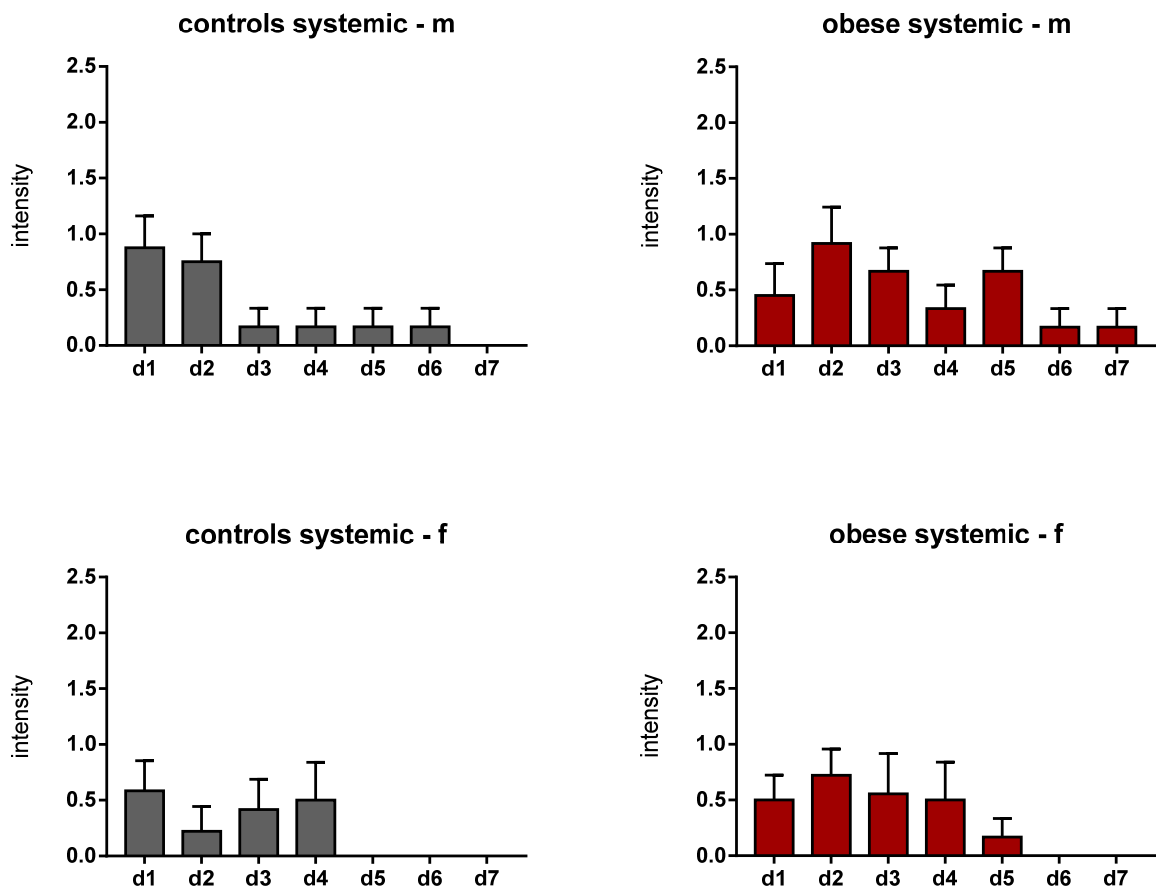

Supplement: Data_Sheet_1.pdf [file Data_Sheet_1.pdf]
